# Supplementary material for: Spatial and Temporal Dynamics and Molecular Evolution of Tula orthohantavirus in German Vole Populations
Source: MDPI journal article supplement (doi:10.3390/v13061132), 2021-06-11
Supplement: s1 [file s1]

**Table S1.** Number of trapped common voles per year, season and trapping methodology as well as derived abundance index as individuals (Ind.) per 100 trap nights (TN). Total trapping effort per trapping session and site was 294 traps (49 snap traps (ST) and 49 live traps (LT) for 3 days).

|       |        |      | Weissach |             |                            | Jeesser |         |                            | Billerbeck  |             |                            | Gotha   |             |                            |     |
|-------|--------|------|----------|-------------|----------------------------|---------|---------|----------------------------|-------------|-------------|----------------------------|---------|-------------|----------------------------|-----|
| Year  | Season | Site | N<br>LT  | N<br>ST     | Abundance<br>[Ind./ 100TN] | N<br>LT | N<br>ST | Abundance<br>[Ind./ 100TN] | N<br>LT     | N<br>ST     | Abundance<br>[Ind./ 100TN] | N<br>LT | N<br>ST     | Abundance<br>[Ind./ 100TN] |     |
| 2010  | Spring | 1    | 0        | 6           | 2.0                        | 12      | 0       | 4.1                        | 1           | 0           | 0.3                        | 1       | 0           | 0.3                        |     |
|       |        | 2    | 2        | 0           | 0.7                        | 3       | 0       | 1.0                        | 0           | 0           | 0.0                        | 0       | 2           | 0.7                        |     |
|       |        | 3    | 0        | 5           | 1.1                        | 3       | 0       | 1.0                        | 0           | 0           | 0.0                        | 8       | 1           | 3.1                        |     |
|       | Summer | 1    | 35       | 14          | 16.7                       | 4       | 4       | 2.7                        | 1           | 0           | 0.3                        | 18      | 0           | 6.1                        |     |
|       |        | 2    | 13       | 5           | 6.1                        | 15      | 10      | 8.5                        | 2           | 3           | 1.7                        | 25      | 2           | 9.2                        |     |
|       |        | 3    | 30       | 11          | 13.9                       | 85      | 10      | 32.3                       | 0           | 0           | 0.0                        | 19      | 1           | 6.8                        |     |
|       | Autumn | 1    | 0        | 0           | 0.0                        | 14      | 1       | 5.1                        | 17          | 7           | 8.2                        | 38      | 2           | 13.6                       |     |
|       |        | 2    | 1        | 1           | 0.7                        | 23      | 1       | 8.2                        | 1           | 0           | 0.3                        | 43      | 12          | 18.7                       |     |
|       |        | 3    | 17       | 2           | 6.5                        | 29      | 3       | 10.9                       | 2           | 0           | 0.7                        | 40      | 11          | 17.3                       |     |
| 2011  | Spring | 1    | 0        | 0           | 0.0                        | 0       | 0       | 0.0                        | 0           | 0           | 0.0                        | 5       | 0           | 1.7                        |     |
|       |        | 2    | 0        | 0           | 0.0                        | 0       | 0       | 0.0                        | 1           | 0           | 0.3                        | 15      | 2           | 5.8                        |     |
|       |        | 3    | 0        | 0           | 0.0                        | 2       | 0       | 0.7                        | 0           | 0           | 0.0                        | 7       | 0           | 2.4                        |     |
|       | Summer | 1    | 11       | 4           | 5.1                        | 0       | 0       | 0.0                        | 0           | 0           | 0.0                        | 22      | 5           | 9.2                        |     |
|       |        | 2    | 22       | 0           | 7.5                        | 0       | 0       | 0.0                        | 0           | 1           | 0.3                        | 8       | 2           | 3.4                        |     |
|       |        | 3    | 116      | 20          | 46.3                       | 0       | 1       | 0.3                        | 0           | 0           | 0.0                        | 12      | 5           | 5.8                        |     |
|       | Autumn | 1    | 3        | 1           | 1.4                        | 8       | 3       | 3.7                        | 3           | 1           | 1.4                        | 28      | 6           | 11.6                       |     |
|       |        | 2    | 0        | 0           | 0.0                        | 15      | 0       | 5.1                        | 5           | 4           | 3.1                        | 57      | 7           | 21.8                       |     |
|       |        | 3    | 78       | 36          | 38.8                       | 5       | 0       | 1.7                        | 0           | 0           | 0.0                        | 29      | 8           | 12.6                       |     |
| 2012  | Spring | 1    | 0        | 0           | 0.0                        | 5       | 0       | 1.7                        | 1           | 1           | 0.7                        | 16      | 2           | 6.1                        |     |
|       |        | 2    | 0        | 0           | 0.0                        | 0       | 0       | 0.0                        | 0           | 0           | 0.0                        | 0       | 0           | 0.0                        |     |
|       |        | 3    | 0        | 0           | 0.0                        | 2       | 0       | 0.7                        | 0           | 2           | 0.7                        | 6       | 2           | 2.7                        |     |
|       | Summer | 1    | 20       | 5           | 8.5                        | 8       | 0       | 2.7                        | 0           | 0           | 0.0                        | 33      | 0           | 11.2                       |     |
|       |        | 2    | 1        | 1           | 0.7                        | 0       | 0       | 0.0                        | 0           | 0           | 0.0                        | 12      | 3           | 5.1                        |     |
|       |        | 3    | 0        | 0           | 0.0                        | 0       | 1       | 0.3                        | 0           | 0           | 0.0                        | 36      | 4           | 13.6                       |     |
|       | Autumn | 1    | 0        | 0           | 0.0                        | 3       | 0       | 1.0                        |             |             |                            | 33      | 7           | 13.6                       |     |
|       |        | 2    | 0        | 0           | 0.0                        | 0       | 0       | 0.0                        | No Trapping |             |                            | 0       | 0           | 0.0                        |     |
|       |        | 3    | 3        | 0           | 1.0                        | 29      | 3       | 10.9                       |             |             |                            | 33      | 5           | 12.9                       |     |
| 2013  | Spring | 1    |          |             |                            | 0       | 0       | 0.0                        |             |             |                            | 0       | 0           | 0.0                        |     |
|       |        | 2    |          | No Trapping |                            |         | 0       | 0                          | 0.0         | No Trapping |                            |         | 0           | 0                          | 0.0 |
|       |        | 3    |          |             |                            | 0       | 0       | 0.0                        |             |             |                            | 0       | 0           | 0.0                        |     |
|       | Summer | 1    |          |             |                            | 3       | 5       | 2.7                        |             |             |                            |         |             |                            |     |
|       |        | 2    |          | No Trapping |                            |         | 0       | 0                          | 0.0         | No Trapping |                            |         | No Trapping |                            |     |
|       |        | 3    |          |             |                            | 0       | 0       | 0.0                        |             |             |                            |         |             |                            |     |
|       | Autumn | 1    |          |             |                            | 0       | 0       | 0.0                        |             |             |                            | 1       | 0           | 0.3                        |     |
|       |        | 2    |          | No Trapping |                            |         | 1       | 0                          | 0.3         | No Trapping |                            |         | 0           | 1                          | 0.3 |
|       |        | 3    |          |             |                            | 21      | 0       | 7.1                        |             |             |                            | 3       | 1           | 1.4                        |     |
| Total |        |      | 352      | 111         |                            | 290     | 42      |                            | 34          | 19          |                            | 548     | 91          |                            |     |

**Table S2.** Results of TULV-IgG ELISA and RT-PCR investigations of field voles

| Year  | Season | Weissach                    |                    |                     | Jeeser                      |                    |                     | Billerbeck                  |                    |                     | Gotha                       |                    |                     |
|-------|--------|-----------------------------|--------------------|---------------------|-----------------------------|--------------------|---------------------|-----------------------------|--------------------|---------------------|-----------------------------|--------------------|---------------------|
|       |        | N<br>individuals<br>trapped | ELISA<br>pos/total | RT-PCR<br>pos/total |
| 2010  | Spring | 4                           | 2/4                | 0/4                 | 9                           | 0/6                | 0/1                 | 0                           | NA                 | NA                  | 0                           | NA                 | NA                  |
|       | Summer | 2                           | 1*/2               | 1**/2               | 7                           | 0/7                | 0/6                 | 0                           | NA                 | NA                  | 14                          | 0/12               | 0/9                 |
|       | Autumn | 0                           | NA                 | NA                  | 1                           | 0/1                | 0/1                 | 0                           | NA                 | NA                  | 36                          | 1/24               | 0/12                |
| 2011  | Spring | 0                           | NA                 | NA                  | 2                           | 0/2                | 0/0                 | 0                           | NA                 | NA                  | 4                           | 0/4                | 0/2                 |
|       | Summer | 1                           | 0/1                | 0/1                 | 1                           | 0/0                | 0/0                 | 0                           | NA                 | NA                  | 17                          | 0/15               | 0/9                 |
|       | Autumn | 1                           | 0/1                | 0/0                 | 6                           | 0/6                | 0/3                 | 1                           | 0/1                | 0/1                 | 16                          | 0/15               | 0/6                 |
| 2012  | Spring | 1                           | 0/1                | 0/0                 | 1                           | 0/0                | 0/0                 | 0                           | NA                 | NA                  | 1                           | 0/1                | 0/0                 |
|       | Summer | 0                           | NA                 | NA                  | 2                           | 0/2                | 0/2                 | No trapping                 |                    |                     | 15                          | 2/15               | 1/14                |
|       | Autumn | 0                           | NA                 | NA                  | 8                           | 2/6                | 0/1                 | No trapping                 |                    |                     | 20                          | 4/19               | 3/16                |
| 2013  | Spring | No trapping                 |                    |                     | 0                           | NA                 | NA                  | No trapping                 |                    |                     | 0                           | NA                 | NA                  |
|       | Summer | No trapping                 |                    |                     | 6                           | 0/6                | 0/6                 | No trapping                 |                    |                     | 0                           | NA                 | NA                  |
|       | Autumn | No trapping                 |                    |                     | 0                           | 0/0                | 0/0                 | No trapping                 |                    |                     | 4                           | 1/4                | 1/4                 |
| Total |        | 9                           | 3**/9              | 1*/7                | 43                          | 2/36               | 0/20                | 1                           | 0/1                | 0/1                 | 127                         | 8/109              | 5/72                |

N, number; NA, not applicable; pos, positive

\* tested positive in PUUV and TULV IgG ELISA; \*\* sequencing revealed a Puumala orthohantavirus sequence, explained by spillover infection (Binder et al., 2020).

**Table S3.** Accession numbers of cytochrome *b* gene sequences of common voles from the four regions in Germany

| ID        | Trapping location | Collection date | Accession number |
|-----------|-------------------|-----------------|------------------|
| KS10/2333 | Jeeser            | 28.07.2010      | MW656486         |
| KS10/2339 | Jeeser            | 27.07.2010      | MW656487         |
| KS10/2393 | Jeeser            | 28.07.2010      | MW656488         |
| KS10/2616 | Billerbeck        | 01.10.2010      | MW656489         |
| KS10/2620 | Billerbeck        | 01.10.2010      | MW656490         |
| KS11/2257 | Billerbeck        | 11.10.2011      | MW656491         |
| KS11/2258 | Billerbeck        | 11.10.2011      | MW656492         |
| KS10/2645 | Weissach          | 27.08.2010      | MW656493         |
| KS10/2646 | Weissach          | 27.08.2010      | MW656494         |
| KS11/2289 | Weissach          | 21.10.2011      | MW656495         |
| KS11/2324 | Weissach          | 25.10.2011      | MW656496         |
| KS11/1850 | Gotha             | 16.07.2011      | MW656497         |
| KS11/1859 | Gotha             | 14.07.2011      | MW656498         |
| KS13/0975 | Gotha             | 26.09.2012      | MW656499         |

**Table S4.** Results of RT-PCR investigations of common voles

| Year  | Season | Weissach    |      | Jeesser   |      | Billerbeck  |      | Gotha     |      |
|-------|--------|-------------|------|-----------|------|-------------|------|-----------|------|
|       |        | pos/total   | %    | pos/total | %    | pos/total   | %    | pos/total | %    |
| 2010  | Spring | 0/11        | 0    | 0/0       | NA   | 0/0         | NA   | 1/7       | 14.3 |
|       | Summer | 9/28        | 32.1 | 15/40     | 37.5 | 0/3         | NA   | 1/19      | 5.3  |
|       | Autumn | 1/3         | NA   | 2/12      | 16.7 | 2/6         | 33.3 | 1/26      | 3.8  |
| 2011  | Spring | 0/0         | NA   | 0/0       | NA   | 0/0         | NA   | 0/2       | NA   |
|       | Summer | 3/40        | 12   | 0/0       | NA   | 0/1         | NA   | 2/17      | 11.8 |
|       | Autumn | 9/40        | 25   | 0/4       | NA   | 0/5         | 0    | 3/28      | 10.7 |
| 2012  | Spring | 0/0         | NA   | 0/0       | NA   | 0/3         | NA   | 0/4       | NA   |
|       | Summer | 2/8         | 33.3 | 0/1       | NA   | No trapping |      | 0/9       | 0    |
|       | Autumn | 0/0         | NA   | 0/3       | NA   | No trapping |      | 1/9       | 11.1 |
| 2013  | Spring | No trapping |      | 0/0       | NA   | No trapping |      | 0/0       | NA   |
|       | Summer | No trapping |      | 0/0       | NA   | No trapping |      | 0/0       | NA   |
|       | Autumn | No trapping |      | 0/2       | NA   | No trapping |      | 0/2       | NA   |
| Total |        | 24/130      | 22   | 17/62     | 27.4 | 2/18        | 11.1 | 9/123     | 7.3  |

NA, not applicable; pos, positive

**Table S5.** Pairwise sequence similarities of TULV S, M and L segment sequences from the four trapping sites and of reference sequences of clades CEN.N and CEN.S.

| Trapping site             | Sequence identity within trapping site             | Similarity with reference CEN.N KS08/0350 Gotha    | Similarity with reference CEN.N KS07/0862 Tremt    | Similarity with reference CEN.S MarDsp01           |
|---------------------------|----------------------------------------------------|----------------------------------------------------|----------------------------------------------------|----------------------------------------------------|
| Jeeser                    | S: 0.912-1<br>M: 0.962-1<br>L: 0.917-1             | S: 0.888-0.896<br>M: 0.850-0.870<br>L: 0.853-0.871 | S: 0.916-0.992<br>M: 0.865-0.985<br>L: 0.923-0.987 | S: 0.794-0.806<br>M: 0.816-0.830<br>L: 0.795-0.828 |
| Gotha                     | S: 0.967-1<br>M: 0.982-1<br>L: 0.958-1             | S: 0.978-0.994<br>M: 0.985-0.997<br>L: 0.963-0.963 | S: 0.888-0.901<br>M: 0.859-0.867<br>L: 0.840-0.868 | S: 0.803-0.806<br>M: 0.841-0.847<br>L: 0.813-0.825 |
| Billerbeck                | S: 0.989-0.998<br>M: 0.983-0.993<br>L: 0.978-0.978 | S: 0.803-0.808<br>M: 0.905-0.910<br>L: 0.795-0.798 | S: 0.801-0.805<br>M: 0.839-0.850<br>L: 0.788-0.792 | S: 0.880-0.884<br>M: 0.841-0.841<br>L: 0.847-0.850 |
| Weissach                  | S: 0.939-1<br>M: 0.953-1<br>L: 0.917-1             | S: 0.786-0.814<br>M: 0.804-0.824<br>L: 0.801-0.834 | S: 0.801-0.825<br>M: 0.807-0.824<br>L: 0.785-0.819 | S: 0.871-0.886<br>M: 0.893-0.916<br>L: 0.859-0.877 |
| All other CEN.N sequences | n.d.                                               | S: 0.872-0.990<br>M: 0.853-0.997<br>L: 0.847-0.954 | S: 0.883-0.927<br>M: 0.841-0.905<br>L: 0.834-0.896 | S: 0.792-0.816<br>M: 0.810-0.847<br>L: 0.798-0.862 |
| All other CEN.S sequences | n.d.                                               | S: 0.794-0.817<br>M: 0.836-0.844<br>L: 0.810-0.819 | S: 0.785-0.805<br>M: 0.821-0.830<br>L: 0.810-0.840 | S: 0.879-0.970<br>M: 0.982-0.988<br>L: 0.837-0.981 |

Sequence length: S (549 nt for Jeeser and Gotha, 546 nt for Billerbeck and Weissach), M 618 nt and L 411 nt. Comparison with reference sequences S (549 nt for CEN.N sequences, 546 nt for CEN.S sequences), M 348 nt and L 327 nt. All other CEN.N and CEN.S sequences are given in Figure S2.  
n.d., not done.

**Table S6.** Accession numbers of all common vole-derived Tula orthohantavirus (TULV) sequences used for consensus tree reconstruction (identical sequences are indicated).

| Isolate   | Trapping location | Host                    | Collection date | S                                                    | M                                                    | L                                |
|-----------|-------------------|-------------------------|-----------------|------------------------------------------------------|------------------------------------------------------|----------------------------------|
| KS10/2322 | Jeeser            | <i>Microtus arvalis</i> | 2010 summer     | MT272834 (identical to MT272836, MT272840, MT272848) | MT272889                                             | MT272927                         |
| KS10/2333 | Jeeser            | <i>Microtus arvalis</i> | 2010 summer     | MT272835 (identical to MT272843)                     | -                                                    |                                  |
| KS10/2339 | Jeeser            | <i>Microtus arvalis</i> | 2010 summer     | MT272836 (identical to MT272834, MT272840, MT272848) | MT272890                                             | MT272928                         |
| KS10/2341 | Jeeser            | <i>Microtus arvalis</i> | 2010 summer     | MT272838 (identical to MT272844, MT272845, MT272839) |                                                      |                                  |
| KS10/2346 | Jeeser            | <i>Microtus arvalis</i> | 2010 summer     | MT272839 (identical to MT272844, MT272845, MT272838) |                                                      |                                  |
| KS10/2357 | Jeeser            | <i>Microtus arvalis</i> | 2010 summer     | MT272840 (identical to MT272834, MT272836, MT272848) | MT272891 (identical to MT272897, MT272899, MT272894) | MT272929 (identical to MT272932) |
| KS10/2360 | Jeeser            | <i>Microtus arvalis</i> | 2010 summer     | MT272841                                             | MT272892                                             | MT272930                         |
| KS10/2364 | Jeeser            | <i>Microtus arvalis</i> | 2010 summer     | MT272842                                             | MT272893                                             | MT272931                         |
| KS10/2366 | Jeeser            | <i>Microtus arvalis</i> | 2010 summer     | MT272843 (identical to MT272835)                     | MT272894 (identical to MT272897, MT272891, MT272899) | MT272932 (identical to MT272929) |

Table S6 (continued)

| Isolate   | Trapping location | Host                    | Collection date | S                                                    | M                                                    | L        |
|-----------|-------------------|-------------------------|-----------------|------------------------------------------------------|------------------------------------------------------|----------|
| KS10/2393 | Jeeser            | <i>Microtus arvalis</i> | 2010 summer     | MT272837 (identical to MT272849)                     | MT272895                                             | MT272933 |
| KS10/2396 | Jeeser            | <i>Microtus arvalis</i> | 2010 summer     | MT272844 (identical to MT272838, MT272845, MT272839) | MT272896                                             | MT272934 |
| KS10/2400 | Jeeser            | <i>Microtus arvalis</i> | 2010 summer     | MT272845 (identical to MT272844, MT272838, MT272839) |                                                      |          |
| KS10/2434 | Jeeser            | <i>Microtus arvalis</i> | 2010 summer     | MT272846 (identical to MT272847, MT272850)           | MT272897 (identical to MT272899, MT272891, MT272894) | MT272935 |
| KS10/2437 | Jeeser            | <i>Microtus arvalis</i> | 2010 summer     | MT272847 (identical to MT272846, MT272850)           | MT272898                                             | MT272936 |
| KS10/2444 | Jeeser            | <i>Microtus arvalis</i> | 2010 summer     | MT272848 (identical to MT272836, MT272840, MT272834) | MT272899 (identical to MT272897, MT272891, MT272894) | MT272937 |
| KS10/3631 | Jeeser            | <i>Microtus arvalis</i> | 2010 fall       | MT272849 (identical to MT272837)                     |                                                      | MT272958 |
| KS11/0016 | Jeeser            | <i>Microtus arvalis</i> | 2010 fall       | MT272850 (identical to MT272846, MT272847)           |                                                      |          |
| KS10/1965 | Billerbeck        | <i>Microtus arvalis</i> | 2010 summer     | MT272852                                             | MT272900                                             | MT272939 |
| KS10/2616 | Billerbeck        | <i>Microtus arvalis</i> | 2010 fall       | MT272851                                             | MT272901                                             | MT272940 |
| KS10/2620 | Billerbeck        | <i>Microtus arvalis</i> | 2010 fall       | MT272853                                             | MT272902                                             |          |

Table S6 (continued)

| Isolate   | Trapping location | Host                    | Collection date | S                                                    | M                                                    | L                                |
|-----------|-------------------|-------------------------|-----------------|------------------------------------------------------|------------------------------------------------------|----------------------------------|
| KS10/1463 | Gotha             | <i>Microtus arvalis</i> | 2010 spring     | MT272854 (identical to MT272861, MT272863, MT272866) | MT272903 (identical to MT272913 MT272911)            | MT272941 (identical to MT272948) |
| KS11/0063 | Gotha             | <i>Microtus arvalis</i> | 2010 fall       | MT272855 (identical to MT272859)                     |                                                      | MT272942 (identical to MT272946) |
| KS11/1850 | Gotha             | <i>Microtus arvalis</i> | 2011 summer     | MT272856                                             | MT272904                                             | MT272943                         |
| KS11/1859 | Gotha             | <i>Microtus arvalis</i> | 2011 summer     | MT272857                                             | MT272905                                             | MT272944                         |
| KS11/2075 | Gotha             | <i>Microtus arvalis</i> | 2011 fall       | MT272858 (identical to MT272860)                     | MT272906 (identical to MT272908)                     | MT272945 (identical to MT272947) |
| KS11/2084 | Gotha             | <i>Microtus arvalis</i> | 2011 fall       | MT272859 (identical to MT272855)                     | MT272907                                             | MT272946 (identical to MT272942) |
| KS11/2125 | Gotha             | <i>Microtus arvalis</i> | 2011 fall       | MT272860 (identical to MT272858)                     | MT272908 (identical to MT272906)                     | MT272947 (identical to MT272945) |
| KS12/2280 | Gotha             | <i>Microtus arvalis</i> | 2012 summer     | MT272861 (identical to MT272854, MT272863, MT272866) | MT272909 (identical to MT272911, MT272913, MT272903) | MT272948 (identical to MT272941) |
| KS13/0959 | Gotha             | <i>Microtus arvalis</i> | 2013 fall       | MT272862                                             | MT272910                                             | MT272949                         |
| KS13/0972 | Gotha             | <i>Microtus arvalis</i> | 2013 fall       | MT272863 (identical to MT272861, MT272854, MT272866) | MT272911 (identical to MT272913,                     | MT272950                         |



Table S6 (continued)

| Isolate   | Trapping location | Host                    | Collection date | S                                                                                                                | M                                                                        | L                                |
|-----------|-------------------|-------------------------|-----------------|------------------------------------------------------------------------------------------------------------------|--------------------------------------------------------------------------|----------------------------------|
| KS13/0972 | Gotha             | <i>Microtus arvalis</i> | 2013 fall       |                                                                                                                  | MT272909, MT272903)                                                      |                                  |
| KS13/0973 | Gotha             | <i>Microtus arvalis</i> | 2013 fall       | MT272864                                                                                                         | MT272912 (identical to MT272906)                                         | MT272951                         |
| KS13/0975 | Gotha             | <i>Microtus arvalis</i> | 2013 fall       | MT272865                                                                                                         |                                                                          |                                  |
| KS13/0978 | Gotha             | <i>Microtus arvalis</i> | 2013 fall       | MT272866 (identical to MT272861, MT272863, MT272854)                                                             | MT272913 (identical to MT272911, MT272909, MT272903)                     |                                  |
| KS10/1936 | Weissach          | <i>Microtus arvalis</i> | 2010 summer     | MT272867 (identical to MT272879)                                                                                 | MT272914                                                                 | MT272952 (identical to MT272960) |
| KS10/2630 | Weissach          | <i>Microtus arvalis</i> | 2010 fall       | MT272868 (identical to MT272869, MT272870, MT272871, MT272872,                                                   |                                                                          | MT272953 (identical to MT272959, |
| KS10/2634 | Weissach          | <i>Microtus arvalis</i> | 2010 fall       | MT272869 (identical to MT272868, MT272870, MT272871, MT272872, MT272875, MT272877, MT272886, MT272888, MT272873) | MT272915 (identical to MT272920, MT272916, MT272917, MT272918, MT272919) | MT272954                         |

Table S6 (continued)

| Isolate   | Trapping location | Host                    | Collection date | S                                                                                                                | M                                                                        | L                                                    |
|-----------|-------------------|-------------------------|-----------------|------------------------------------------------------------------------------------------------------------------|--------------------------------------------------------------------------|------------------------------------------------------|
| KS10/2636 | Weissach          | <i>Microtus arvalis</i> | 2010 summer     | MT272870 (identical to MT272869, MT272868, MT272871, MT272872, MT272875, MT272877, MT272886, MT272888, MT272873) | MT272916 (identical to MT272915, MT272920, MT272917, MT272918, MT272919) |                                                      |
| KS10/2644 | Weissach          | <i>Microtus arvalis</i> | 2010 summer     | MT272871 (identical to MT272869, MT272870, MT272868, MT272872, MT272875, MT272877, MT272886, MT272888, MT272873) | MT272917 (identical to MT272915, MT272916, MT272920, MT272918, MT272919) | MT272955                                             |
| KS10/2645 | Weissach          | <i>Microtus arvalis</i> | 2010 summer     | MT272872 (identical to MT272869, MT272870, MT272871, MT272868, MT272875, MT272877, MT272886, MT272888, MT272873) | MT272918 (identical to MT272915, MT272916, MT272919)                     | MT272956 (identical to MT272953, MT272959, MT272957) |
| KS10/2646 | Weissach          | <i>Microtus arvalis</i> | 2010 summer     | MT272873 (identical to MT272869, MT272870, MT272871, MT272868, MT272875, MT272877, MT272886, MT272888, MT272872) | MT272919 (identical to MT272915, MT272916, MT272917, MT272918, MT272920) | MT272957 (identical to MT272953, MT272956, MT272959) |

Table S6 (continued)

| Isolate   | Trapping location | Host                    | Collection date | S                                                                                                      | M                                                                           | L                                                       |
|-----------|-------------------|-------------------------|-----------------|--------------------------------------------------------------------------------------------------------|-----------------------------------------------------------------------------|---------------------------------------------------------|
| KS10/3581 | Weissach          | <i>Microtus arvalis</i> | 2010 fall       | MT272874 (identical to MT272878, MT272881, MT272883, MT272884)                                         | Identical to MT272922                                                       | MT272938                                                |
| KS11/1955 | Weissach          | <i>Microtus arvalis</i> | 2011 fall       | MT272875 (identical to MT272869, MT272870, MT272871, MT272872, MT272868, MT272877, MT272886, MT272888) |                                                                             | MT272959<br>(identical to MT272953, MT272956, MT272957) |
| KS11/1998 | Weissach          | <i>Microtus arvalis</i> | 2011 summer     | MT272876                                                                                               |                                                                             | MT272960<br>(identical to MT272952)                     |
| KS11/2019 | Weissach          | <i>Microtus arvalis</i> | 2011 summer     | MT272877 (identical to MT272869, MT272870, MT272871, MT272872, MT272875, MT272868, MT272886, MT272888) | MT272920<br>(identical to MT272915, MT272916, MT272917, MT272918, MT272919) | MT272961                                                |
| KS11/2289 | Weissach          | <i>Microtus arvalis</i> | 2011 fall       | MT272878 (identical to MT272874, MT272881, MT272883, MT272884)                                         |                                                                             | MT272962<br>(identical to MT272966, MT272969)           |
| KS11/2302 | Weissach          | <i>Microtus arvalis</i> | 2011 fall       | MT272879 (identical to MT272867)                                                                       |                                                                             | MT272963                                                |
| KS11/2305 | Weissach          | <i>Microtus arvalis</i> | 2011 fall       | MT272880 (identical to MT272886)                                                                       | MT272921                                                                    | MT272964                                                |
| KS11/2313 | Weissach          | <i>Microtus arvalis</i> | 2011 fall       | MT272881 (identical to MT272878, MT272741, MT272883, MT272884)                                         | MT272922                                                                    | MT272965                                                |

Table S6 (continued)

| Isolate   | Trapping location | Host                    | Collection date | S                                                                                                                | M                                                    | L                                          |
|-----------|-------------------|-------------------------|-----------------|------------------------------------------------------------------------------------------------------------------|------------------------------------------------------|--------------------------------------------|
| KS11/2314 | Weissach          | <i>Microtus arvalis</i> | 2011 fall       | MT272882 (identical to MT272885)                                                                                 | MT272923 (identical to MT272926, MT272924, MT272925) | MT272966 (identical to MT272969, MT272962) |
| KS11/2315 | Weissach          | <i>Microtus arvalis</i> | 2011 fall       | MT272883 (identical to MT272878, MT272881, MT272874, MT272884)                                                   | MT272924 (identical to MT272923, MT272926, MT272925) | MT272967                                   |
| KS11/2318 | Weissach          | <i>Microtus arvalis</i> | 2011 fall       | MT272884 (identical to MT272878, MT272881, MT272883, MT272874)                                                   | MT272925 (identical to MT272923, MT272924, MT272926) | MT272968                                   |
| KS11/2324 | Weissach          | <i>Microtus arvalis</i> | 2011 fall       | MT272885 (identical to MT272885)                                                                                 | MT272926 (identical to MT272923, MT272924, MT272925) | MT272969 (identical to MT272966, MT272962) |
| KS11/2325 | Weissach          | <i>Microtus arvalis</i> | 2011 fall       | MT272886 (identical to MT272869, MT272870, MT272871, MT272872, MT272875, MT272877, MT272878, MT272888, MT272880) |                                                      | MT272970                                   |
| KS12/2325 | Weissach          | <i>Microtus arvalis</i> | 2012 summer     | MT272887                                                                                                         |                                                      |                                            |
| KS12/2338 | Weissach          | <i>Microtus arvalis</i> | 2012 summer     | MT272888 (identical to MT272869,                                                                                 |                                                      |                                            |

**Table S6 (continued)**

| Isolate   | Trapping location | Host                    | Collection date | S                                                                     | M | L |
|-----------|-------------------|-------------------------|-----------------|-----------------------------------------------------------------------|---|---|
| KS12/2338 | Weissach          | <i>Microtus arvalis</i> | 2012 summer     | MT272870, MT272871, MT272872, MT272875, MT272877, MT272886, MT272868) |   |   |
